# Supplementary material for: Facile Synthesis of Gold Nanoparticles with Alginate and Its Catalytic Activity for Reduction of 4-Nitrophenol and H2O2 Detection
Source: PubMed Central journal article supplement (PMC5459079; doi:10.3390/ma10050557), 2017-05-19
Supplement: materials-10-00557-s001.pdf [file materials-10-00557-s001.pdf]

## Facile Synthesis of Gold Nanoparticles with Alginate and Its Catalytic Activity for Reduction of 4-Nitrophenol and H<sub>2</sub>O<sub>2</sub> Detection

Xihui Zhao<sup>1,2,\*</sup>, Zichao Li<sup>3</sup>, Yujia Deng<sup>1</sup>, Zhihui Zhao<sup>1,2</sup>, Xiaowen Li<sup>1</sup> and Yanzhi Xia<sup>2,3,\*</sup>

<sup>1</sup> School of Chemistry and Chemical Engineering, Qingdao University, Qingdao 266071, China; dengyujia@qdu.edu.cn (Y.D.); zzh@qdu.edu.cn (Z.Z.); xiaowenli@qdu.edu.cn (X.L.)

<sup>2</sup> Collaborative Innovation Center for Marine Biomass Fibers, Materials and Textiles of Shandong Province, Institute of Marine Bionbased Materials, Qingdao University, Qingdao 266071, China

<sup>3</sup> State Key Laboratory Breeding Base of New Fiber Materials and Modern Textile, School of Materials Science and Engineering, Qingdao University, Qingdao 266071, China; zichaoqi@qdu.edu.cn

\* Correspondence: zhaoxihui@qdu.edu.cn (X.Z.); xiayzh@qdu.edu.cn (Y.X.); Tel.: +86-532-8595-0705 (X.Z.)

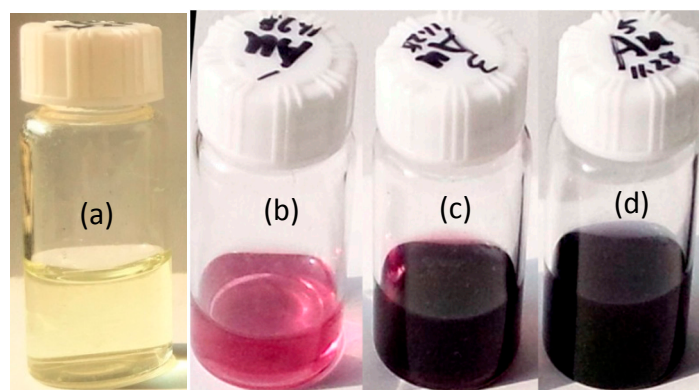

**Figure S1.** Digital photograph of sodium alginate solution (1.0%) mixed HAuCl<sub>4</sub> before reaction (a) and after reaction 60 min at 90 °C with 0.25, 1.0, 3.5 mM of HAuCl<sub>4</sub>50, respectively (b-c).

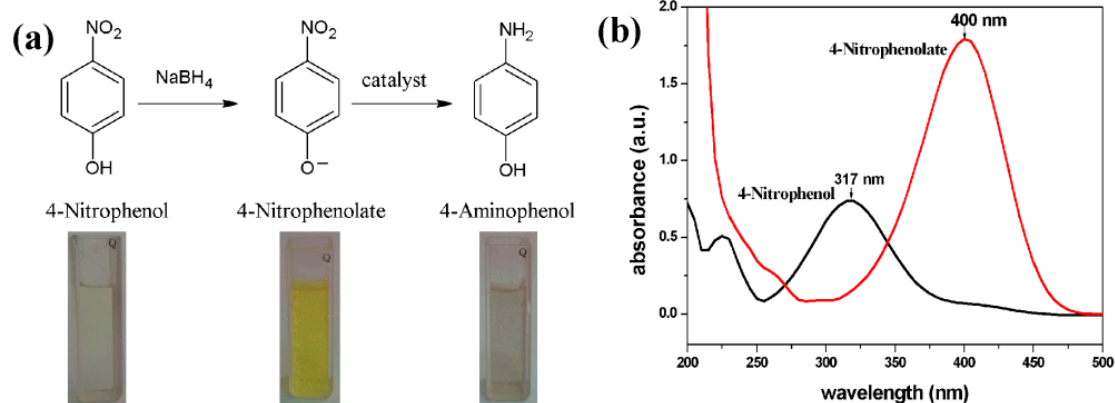

**Figure S2.** (a) The reduction reaction for the conversion of 4-NP to 4-AP; (b) UV-vis absorption spectra of 4-NP before and after addition of NaBH<sub>4</sub>.

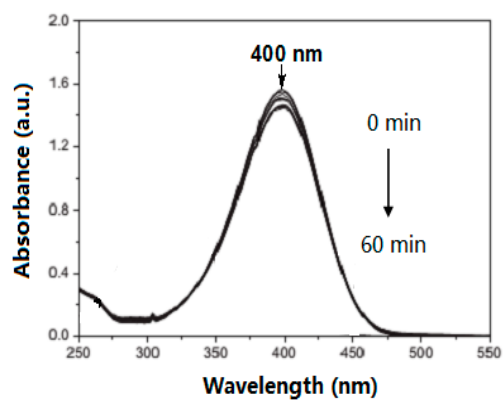

**Figure S3.** Time-dependent absorption spectra of the reaction solution of 4-NP to 4-AP in absence of catalyst.
